# Supplementary material for: The Performance of HE4 Alone and in Combination with CA125 for the Detection of Ovarian Cancer in an Enriched Primary Care Population
Source: MDPI journal article supplement (doi:10.3390/cancers14092124), 2022-04-24
Supplement: s1 [file s1]

Supplementary Materials

# The Performance of HE4 Alone and in Combination with CA125 for the Detection of Ovarian Cancer in an Enriched Primary Care Population

Chloe E. Barr, Garth Funston, David Jeevan, Sudha Sundar, Luke T. A. Mounce and Emma J. Crosbie

**Table S1.** Malignancies diagnosed within 12 months of index CA125 test in primary care group.

| ID no ( <i>n</i> = 17) | Tumour Site     | Histological subtype              | Grade | Stage                                     | CA125 ≥ 35 U/mL | HE4 ≥ 77 pmol/L |
|------------------------|-----------------|-----------------------------------|-------|-------------------------------------------|-----------------|-----------------|
| 3                      | Breast          | Invasive ductal                   | 2     | T2, N0, M0                                | No              | No              |
| 254                    | Breast          | Mixed invasive lobular and ductal | 2     | Lobular- T2, N0, M0<br>Ductal- T1, N0, M0 | No              | No              |
| 459                    | Colorectal      | Adenocarcinoma                    | 2     | T4, N0, M0                                | No              | No              |
| 29                     | Colorectal      | Adenocarcinoma                    | 2     | T3, N0, M0                                | Yes             | Yes             |
| 996                    | Colorectal      | Adenocarcinoma                    | 3     | T4a, N2b, M0                              | Yes             | No              |
| 1130                   | Colorectal      | Adenocarcinoma                    | 2     | T3, N0, M0                                | No              | Yes             |
| 455                    | Lung            | Non-small cell                    | NK    | T1C, N0, M0                               | No              | Yes             |
| 696                    | Lung            | Non-small cell                    | NK    | T1A, N0, M0                               | No              | Yes             |
| 1010                   | Lung            | Non-small cell                    | NK    | T1c, N0, M0                               | No              | Yes             |
| 64                     | Endometrial     | Endometrioid                      | 1     | 1A                                        | No              | No              |
| 580                    | Endometrial     | Endometrioid                      | 3     | 1B                                        | Yes             | Yes             |
| 1214                   | Endometrial     | Endometrioid                      | 1     | 1A                                        | No              | Yes             |
| 436                    | Ovarian         | Borderline serous                 | NA    | 1C                                        | Yes             | No              |
| 542                    | Ovarian         | Serous                            | 3     | 4B                                        | Yes             | Yes             |
| 967                    | Renal           | Transitional cell carcinoma       | NK    | T4b, N2, M0                               | No              | Yes             |
| 1081                   | Unknown Primary | Adenocarcinoma                    | 3     | 4B                                        | Yes             | Yes             |
| 1221                   | Lymphoma        | Extra nodal marginal zone         | NK    | NK                                        | No              | Yes             |

n- number. NK- not known

**Table S2.** Clinico-demographics of the cohort referred to hospital for investigation with a raised serum HE4 (*n* = 101).

| Clinico- demographic variable | Number (%)   |
|-------------------------------|--------------|
| <b>Age (years)</b>            |              |
| Median (IQR)                  | 61.5 (51–75) |
| <b>BMI (kg/m<sup>2</sup>)</b> |              |
| Median (IQR)                  | 26 (23–31)   |
| <b>Ethnicity</b>              |              |
| White                         | 74 (73.3)    |
| Black                         | 6 (5.9)      |
| Asian                         | 18 (17.8)    |
| Mixed                         | 0 (0)        |
| Other                         | 3 (3)        |
| <b>Smoking status</b>         |              |
| Non- smoker                   | 45 (44.6)    |
| Ex- smoker                    | 26 (25.7)    |
| Current smoker                | 30 (29.7)    |
| <b>Menopausal status</b>      |              |
| Pre- menopausal               | 22 (21.8)    |
| Post- menopausal              | 79 (78.2)    |
| <b>Parity</b>                 |              |
| Nulliparous                   | 18 (17.8)    |
| Multiparous                   | 83 (82.2)    |
| <b>Co-morbidities</b>         |              |

|                                                             |           |
|-------------------------------------------------------------|-----------|
| <b>Cardiac</b>                                              |           |
| Hypertension                                                | 31 (30.7) |
| Atrial Fibrillation                                         | 2 (2)     |
| Heart Failure                                               | 3 (3)     |
| Ischaemic heart disease                                     | 8 (7.9)   |
| <b>Respiratory</b>                                          |           |
| Asthma                                                      | 10 (9.9)  |
| COPD                                                        | 14 (13.9) |
| <b>Endocrine</b>                                            |           |
| Diabetes Mellitus                                           | 12 (11.9) |
| Hypothyroidism                                              | 12 (11.9) |
| <b>Renal</b>                                                |           |
| Chronic kidney disease                                      | 1 (1)     |
| <b>Gynaecological</b>                                       |           |
| Endometriosis                                               | 3 (3)     |
| Fibroids                                                    | 1 (1)     |
| PCOS                                                        | 2 (2)     |
| <b>Other Previous Malignancy</b>                            |           |
| Breast                                                      | 6 (5.9)   |
| Lymphoma                                                    | 1 (1)     |
| Renal                                                       | 1 (1)     |
| <b>Presenting Complaint</b>                                 |           |
| <b>Ovarian Cancer symptom<sup>1</sup></b>                   |           |
| Abdominal/ pelvic pain                                      | 61 (60.4) |
| Abdominal distension                                        | 23 (22.8) |
| Satiety/ loss appetite                                      | 3 (3)     |
| Increased urinary urgency/ frequency                        | 4 (4)     |
| <b>Other symptoms related to ovarian cancer<sup>1</sup></b> |           |
| Unexplained weight loss                                     | 13 (12.9) |
| Fatigue                                                     | 3 (3)     |
| Change in bowel habit                                       | 5 (5)     |
| <b>General Gynaecological symptom</b>                       |           |
| Post-menopausal bleeding                                    | 3 (3)     |
| Uro-genital prolapse                                        | 1 (1)     |
| Vaginal discharge                                           | 1 (1)     |
| Intermenstrual bleeding                                     | 3 (3)     |
| Secondary amenorrhoea                                       | 2 (2)     |
| Dysmenorrhoea                                               | 2 (2)     |
| <b>Other</b>                                                |           |
| Hair loss                                                   | 1 (1)     |
| Abnormal Blood Glucose                                      | 1 (1)     |
| Anaemia                                                     | 1 (1)     |
| Foot swelling                                               | 1 (1)     |
| Rash                                                        | 1 (1)     |
| <b>Final Diagnosis</b>                                      |           |
| <b>No Pathology</b>                                         | 77 (76.2) |
| <b>Benign Gynae pathology</b>                               |           |
| Ovarian cyst                                                | 10 (9.9)  |
| Endometrial polyp                                           | 3 (3)     |
| Atrophy                                                     | 1 (1)     |
| Hydrosalpinx                                                | 1 (1)     |
| Fibroids                                                    | 2 (2)     |
| Endometriosis                                               | 1 (1)     |
| Uro-Genital prolapse                                        | 1 (1)     |
| Dysfunctional uterine bleeding                              | 1 (1)     |
| <b>Other</b>                                                |           |
| Adnexal fibrosis                                            | 1 (1)     |
| Constipation                                                | 1 (1)     |
| Chronic urinary retention                                   | 1 (1)     |
| Did not attend investigation                                | 1 (1)     |
| <b>Malignancy</b>                                           | 0 (0)     |

<sup>1</sup> As per the NICE Guidelines (4). IQR- interquartile range. n- number
